# Supplementary material for: Integrative Lipidomics and Metabolomics for System-Level Understanding of the Metabolic Syndrome in Long-Term Treated HIV-Infected Individuals
Source: PubMed Central journal article supplement (PMC8791652; doi:10.3389/fimmu.2021.742736), 2022-01-12
Supplement: DataSheet_1.pdf [file DataSheet_1.pdf]

## Supplementary Material

### 1 Supplementary Data

**Supplementary Data File S1:** Original Scale Lipidomics Data.

**Supplementary Data File S2:** Overview of statistical outcomes from Mann Whitney U test, limma, PLS-DA and random forest. Outcome from statistical and machine learning methods identifying lipid species differentiating PLWH without MetS from PLWH with MetS. The table includes significant lipid species and their super pathway together with results from the four used methods Mann Whitney u test (pvalue and FDR adjusted pvalues), limma (pvalue and FDR adjusted pvalues), PLS-DA (variable importance on projection (VIP) values) and random forest (lowest rank indicating strongest predictors of separating PLWH without MetS from PLWH with MetS). Cells with hyphens illustrates that the concerned lipid specie is found not to significantly differentiating the two groups by the concerned method.

The lipidomics data can be obtained from the [dx.doi.org/10.6084/m9.figshare.14509452](https://dx.doi.org/10.6084/m9.figshare.14509452)

### 2 Supplementary Figures and Tables

#### 2.1 Supplementary Figures

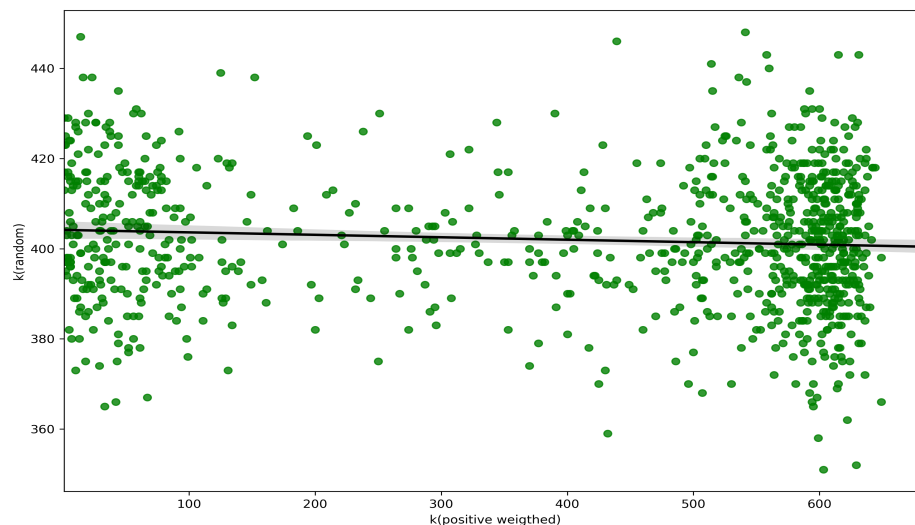

**Supplementary Figure S1:** Degree distribution for the positive weighted against the random network.

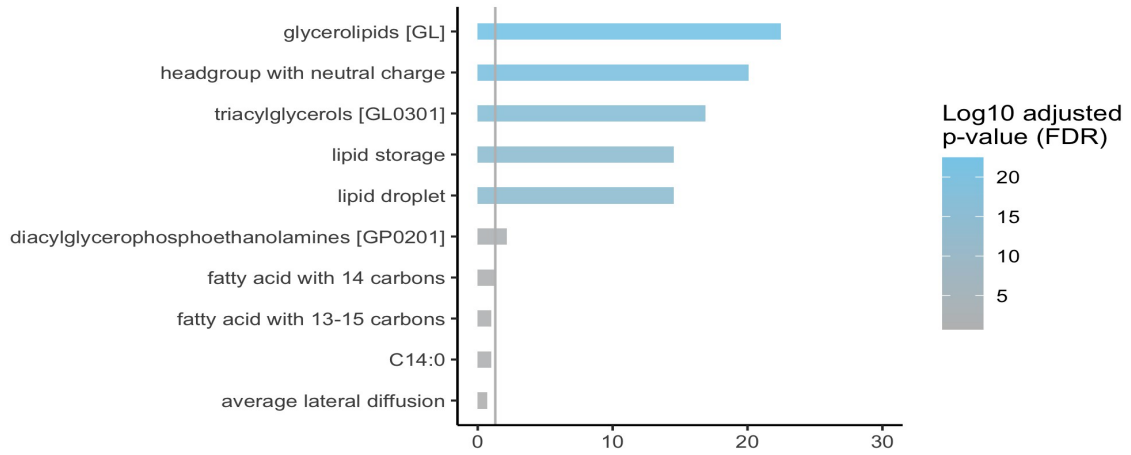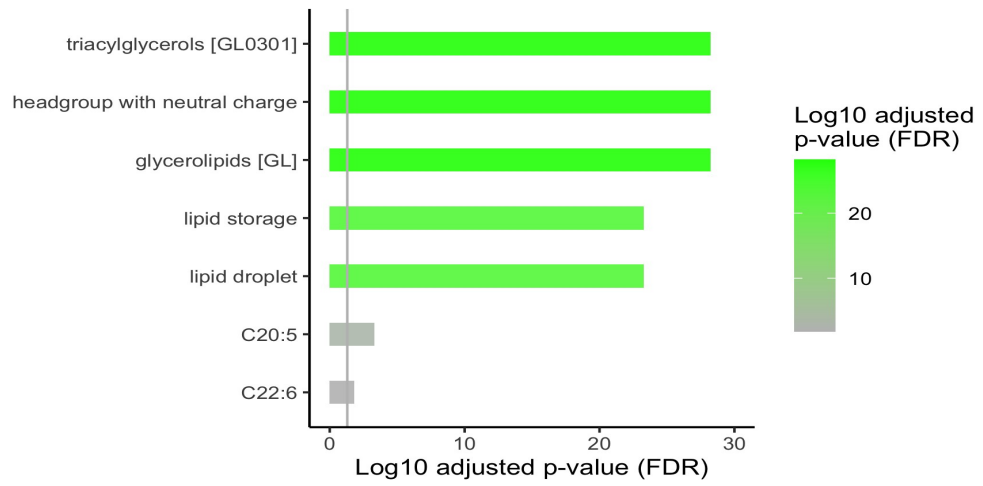

**a.**

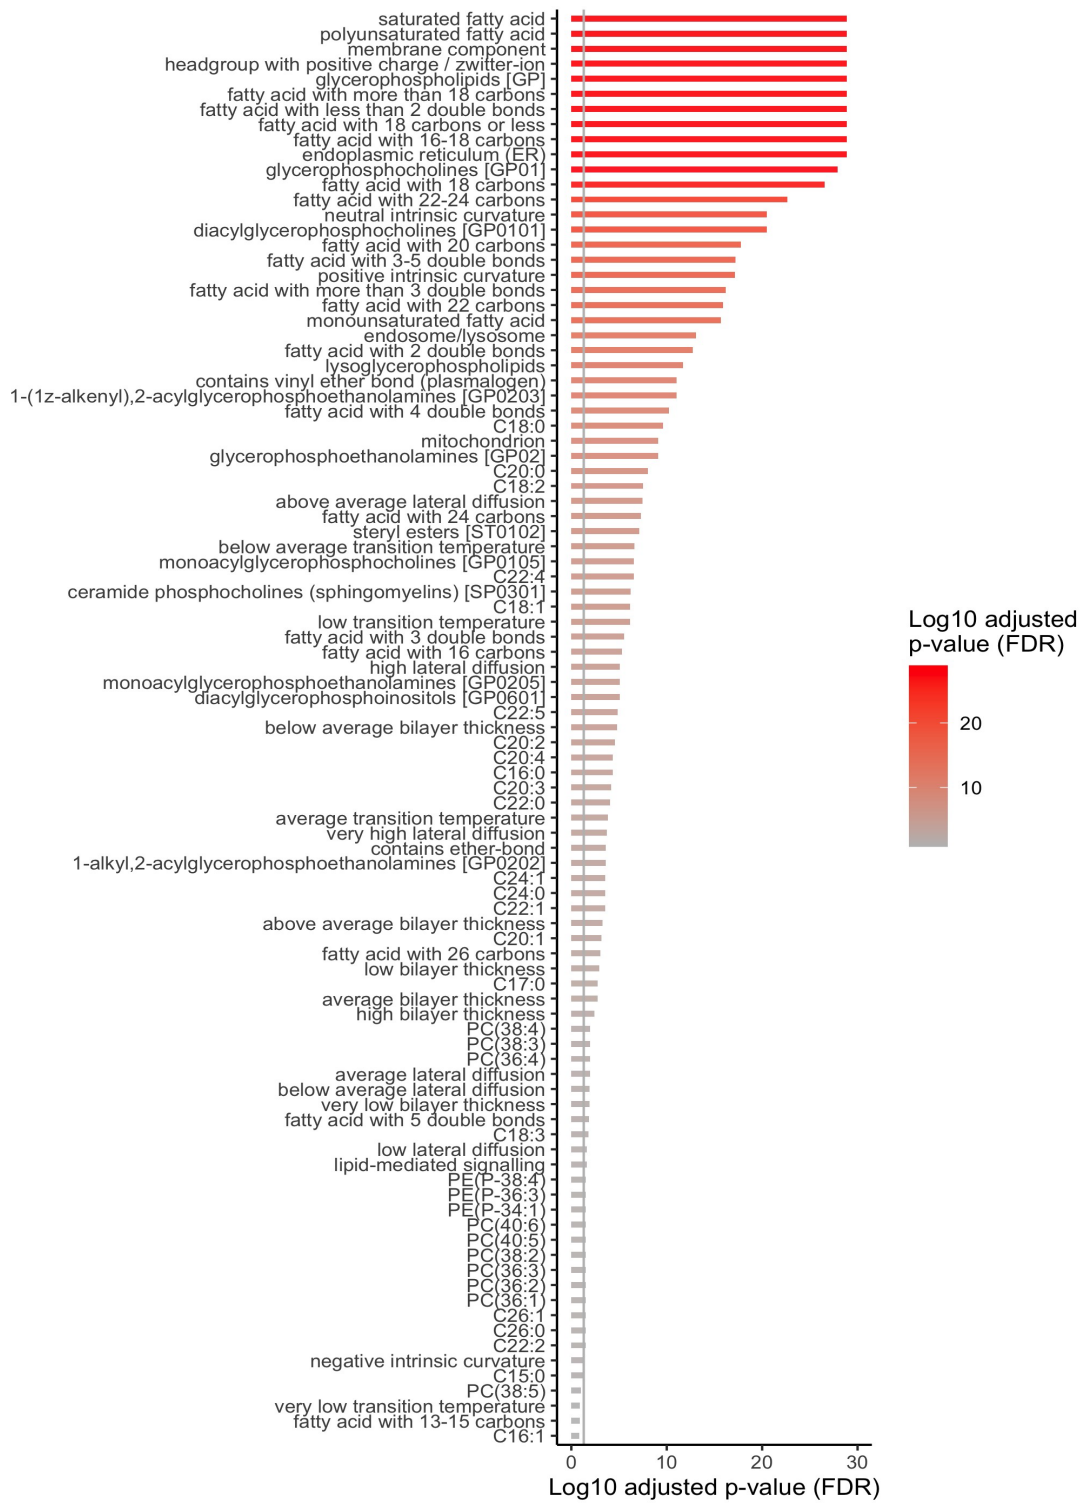

b.

**Supplementary Figure S2:** Ontology enrichment plots for the three communities c1, c2 and c3. (a) Ontology enrichment plots for community c1 (blue) and c2 (green). (b) Ontology enrichment plot for community c3.

## 2.2. Supplementary Tables

**Supplementary Table S1:** Network properties of the positive and random network. Including type of network (Network), node count (Nodes), edge count (Edges), average degree of network (AvgD), average path length (AvgPL), clustering coefficient (CC), if the network is connected or not (C?) and the minimum cut off (MinCut).

| Network           | Nodes | Edges  | AvgD | AvgPL | CC   | C?   | MinCut |
|-------------------|-------|--------|------|-------|------|------|--------|
| Positive weighted | 917   | 184304 | 402  | 1.72  | 0.87 | True | 1      |
| Random            | 917   | 184304 | 402  | 1.56  | 0.44 | True | 351    |

**Supplementary Table S2:** Table of community properties including size and average degree of the three identified communities. The size corresponds to the number of lipids and metabolites (nodes) within each community. The average degree of the community corresponds to how connected lipids and metabolites (nodes) within the concerned community are.

| Community | Biomolecules | Avg. degree | Lipids | Metabolites |
|-----------|--------------|-------------|--------|-------------|
| c1        | 339          | 534.63      | 333    | 6           |
| c2        | 318          | 506.58      | 318    | 0           |
| c3        | 260          | 101.05      | 257    | 3           |

**Supplementary Table S3: A structural composition table, providing an overview of composition of enriched glycerolipids in the network communities c1 and c2.**

| Communities                     | c1           | c2         |
|---------------------------------|--------------|------------|
| Biomolecules in community       | 339          | 264        |
| TAGs in community (n, %)        | 252 (74%)    | 318 (83%)  |
| Average TAG carbon number       | 49 (38-56)   | 55 (48-60) |
| Average TAG double-bond content | 2 (0-8)      | 5 (0-12)   |
| DAGs in community (n, %)        | 28 (8%)      | 24 (9%)    |
| Average DAG carbon number       | 32.5 (28-36) | 37 (34-40) |
| Average DAG double-bond content | 1.5 (0-5)    | 5 (2-8)    |

**Supplementary Table S4:** Correlation table predicting clinical variables based on the community score (FDR < 0.12). Ranked according to FDR (p-value adj).

| Community | Clinical variable | estimate | std. error | t value | p-value  | p-value adj |
|-----------|-------------------|----------|------------|---------|----------|-------------|
| c1        | MetS              | 0.29     | 0.04       | 7.31    | 6.48e-12 | < 0.000001  |
| c3        | MetS              | 0.31     | 0.04       | 7.30    | 6.73e-12 | < 0.000001  |
| c1        | VAT               | 36.34    | 6.07       | 5.99    | 9.83e-09 | < 0.000001  |
| c3        | VAT               | 42.96    | 6.15       | 6.98    | 4.31e-11 | < 0.000001  |
| c3        | Exposure preART   | 0.13     | 0.05       | 2.86    | 0.004    | < 0.12      |
| c2        | MetS              | 0.19     | 0.08       | 2.32    | 0.019    | < 0.12      |
| c1        | Exposure preART   | 0.10     | 0.04       | 2.36    | 0.019    | < 0.12      |

**Supplementary Table S5:** Association table predicting clinical variables based on each lipid and metabolite concentration (FDR < 0.07) within community c1. The model is adjusted for MetS, sex and age. Ranked according to FDR (p-value adj). Five key lipids and one key metabolite were associated with VAT and marked in bold in the table.

| Clinical variable | Biochemicals       | estimate | std. error | t value | p-value  | p-value adj |
|-------------------|--------------------|----------|------------|---------|----------|-------------|
| ART_PI            | DAG(14:0/18:3)     | 0.25     | 0.03       | 8.02    | 9.51e-14 | < 1 e-6     |
| VAT               | TAG(52:2)-FA(16:0) | 22.86    | 4.72       | 4.85    | 3,00E-06 | < 0.01      |
| VAT               | TAG(52:2)-FA(18:1) | 22.43    | 4.75       | 4.72    | 4,00E-06 | < 0.01      |
| VAT               | glutamate          | 20.04    | 4.44       | 4.51    | 1.1e-5   | < 0.01      |
| VAT               | TAG(50:3)-FA(16:0) | 21.39    | 4.75       | 4.5     | 1.2e-5   | < 0.01      |
| VAT               | TAG(54:4)-FA(20:4) | 21.04    | 4.63       | 4.54    | 1,00E-05 | < 0.01      |
| VAT               | DAG(18:0/18:1)     | 20.45    | 4.58       | 4.47    | 1.3e-5   | < 0.01      |
| VAT               | TAG(56:4)-FA(22:4) | 20.59    | 4.62       | 4.45    | 1.4e-5   | < 0.01      |
| VAT               | TAG(56:5)-FA(22:4) | 20.6     | 4.62       | 4.46    | 1.4e-5   | < 0.01      |
| VAT               | TAG(54:5)-FA(22:5) | 20.03    | 4.62       | 4.33    | 2.3e-5   | < 0.01      |
| VAT               | DAG(16:0/18:1)     | 20.44    | 4.75       | 4.31    | 2.6e-5   | < 0.01      |
| VAT               | TAG(50:4)-FA(16:0) | 20.05    | 4.72       | 4.25    | 3.3e-5   | < 0.01      |
| VAT               | TAG(50:2)-FA(16:0) | 20.09    | 4.78       | 4.2     | 4,00E-05 | < 0.01      |
| VAT               | DAG(16:0/20:4)     | 19.64    | 4.7        | 4.18    | 4.4e-5   | < 0.01      |
| VAT               | TAG(51:3)-FA(16:0) | 19.45    | 4.72       | 4.12    | 5.6e-5   | < 0.01      |
| VAT               | TAG(52:1)-FA(18:1) | 19.04    | 4.62       | 4.12    | 5.6e-5   | < 0.01      |
| VAT               | TAG(50:2)-FA(18:2) | 19.11    | 4.68       | 4.08    | 6.6e-5   | < 0.01      |
| VAT               | TAG(50:3)-FA(18:3) | 19.05    | 4.67       | 4.08    | 6.4e-5   | < 0.01      |
| VAT               | TAG(51:4)-FA(16:0) | 19.34    | 4.73       | 4.08    | 6.4e-5   | < 0.01      |
| VAT               | TAG(54:3)-FA(20:3) | 18.91    | 4.71       | 4.01    | 8.6e-5   | < 0.01      |
| VAT               | TAG(50:1)-FA(16:0) | 18.68    | 4.72       | 3.96    | 1.06e-4  | < 0.07      |
| VAT               | TAG(52:1)-FA(16:0) | 18.23    | 4.6        | 3.96    | 1.06e-4  | < 0.07      |
| VAT               | TAG(50:3)-FA(18:2) | 18.86    | 4.79       | 3.94    | 1.13e-4  | < 0.07      |
| VAT               | TAG(54:4)-FA(22:4) | 18.09    | 4.63       | 3.9     | 1.3e-4   | < 0.07      |
| VAT               | TAG(50:1)-FA(18:1) | 17.92    | 4.72       | 3.79    | 1.98e-4  | < 0.07      |
| VAT               | TAG(52:2)-FA(18:0) | 17.43    | 4.59       | 3.8     | 1.95e-4  | < 0.07      |
| ART_PI            | PI(16:0/20:3)      | 0.13     | 0.03       | 3.74    | 2.43e-4  | < 0.07      |
| VAT               | TAG(53:4)-FA(16:0) | 17.31    | 4.68       | 3.7     | 2.83e-4  | < 0.07      |
| VAT               | TAG(54:3)-FA(20:2) | 17.4     | 4.74       | 3.67    | 3.13e-4  | < 0.07      |
| VAT               | TAG(52:3)-FA(20:3) | 17.13    | 4.72       | 3.63    | 3.64e-4  | < 0.07      |
| VAT               | TAG(52:4)-FA(20:4) | 16.51    | 4.6        | 3.59    | 4.21e-4  | < 0.07      |
| VAT               | TAG(51:3)-FA(18:3) | 16.34    | 4.61       | 3.54    | 4.95e-4  | < 0.07      |
| VAT               | TAG(50:2)-FA(16:1) | 16.84    | 4.76       | 3.54    | 5,00E-04 | < 0.07      |
| VAT               | DAG(16:1/20:4)     | 16.53    | 4.67       | 3.54    | 5.09e-4  | < 0.07      |

|           |                    |       |      |       |          |        |
|-----------|--------------------|-------|------|-------|----------|--------|
| VAT       | TAG(52:1)-FA(18:0) | 15.98 | 4.55 | 3.52  | 5.46e-4  | < 0.07 |
| VAT       | DAG(16:1/18:0)     | 16.17 | 4.63 | 3.49  | 5.91e-4  | < 0.07 |
| VAT       | TAG(51:2)-FA(16:0) | 16.44 | 4.73 | 3.47  | 6.32e-4  | < 0.07 |
| VAT       | TAG(50:2)-FA(18:1) | 16.55 | 4.79 | 3.45  | 6.79e-4  | < 0.07 |
| VAT       | TAG(53:3)-FA(16:0) | 15.82 | 4.63 | 3.42  | 7.75e-4  | < 0.07 |
| VAT       | DAG(16:0/16:1)     | 15.97 | 4.73 | 3.37  | 8.98e-4  | < 0.07 |
| VAT       | TAG(51:3)-FA(17:0) | 15.88 | 4.71 | 3.37  | 8.98e-4  | < 0.07 |
| VAT       | TAG(53:2)-FA(17:0) | 15.54 | 4.6  | 3.37  | 8.91e-4  | < 0.07 |
| VAT       | TAG(54:5)-FA(22:4) | 15.92 | 4.72 | 3.37  | 8.99e-4  | < 0.07 |
| VAT       | TAG(52:5)-FA(20:4) | 15.7  | 4.67 | 3.36  | 9.46e-4  | < 0.07 |
| VAT       | TAG(50:1)-FA(16:1) | 15.49 | 4.65 | 3.33  | 0.001044 | < 0.07 |
| SAT       | TAG(48:4)-FA(18:1) | -16.1 | 4.9  | -3.29 | 0.001196 | < 0.07 |
| VAT       | TAG(54:2)-FA(20:2) | 15.33 | 4.66 | 3.29  | 0.0012   | < 0.07 |
| ART_NNRTI | TAG(48:2)-FA(12:0) | 0.12  | 0.04 | 3.28  | 0.00123  | < 0.07 |
| VAT       | TAG(53:4)-FA(20:4) | 15.17 | 4.63 | 3.28  | 0.001238 | < 0.07 |
| VAT       | DAG(16:0/18:0)     | 14.99 | 4.58 | 3.27  | 0.001258 | < 0.07 |
| VAT       | TAG(52:4)-FA(22:4) | 15.11 | 4.62 | 3.27  | 0.00126  | < 0.07 |
| VAT       | TAG(51:2)-FA(18:2) | 15.04 | 4.61 | 3.26  | 0.001304 | < 0.07 |
| VAT       | TAG(53:5)-FA(20:4) | 15.18 | 4.68 | 3.24  | 0.001385 | < 0.07 |
| ART_NNRTI | TAG(44:2)-FA(18:1) | 0.12  | 0.04 | 3.23  | 0.001444 | < 0.07 |
| VAT       | DAG(16:1/18:1)     | 15.36 | 4.75 | 3.23  | 0.001448 | < 0.07 |
| VAT       | DAG(16:0/20:3)     | 15.36 | 4.76 | 3.23  | 0.001456 | < 0.07 |
| VAT       | TAG(52:6)-FA(20:4) | 15.19 | 4.71 | 3.23  | 0.001475 | < 0.07 |
| VAT       | DAG(14:0/18:1)     | 14.97 | 4.66 | 3.21  | 0.001551 | < 0.07 |
| VAT       | TAG(48:3)-FA(16:0) | 14.89 | 4.64 | 3.21  | 0.001563 | < 0.07 |
| VAT       | TAG(50:3)-FA(16:1) | 15.1  | 4.75 | 3.18  | 0.00171  | < 0.07 |
| VAT       | TAG(50:2)-FA(14:0) | 14.77 | 4.66 | 3.17  | 0.001786 | < 0.07 |
| ART_NNRTI | CER(14:0)          | 0.11  | 0.04 | 3.16  | 0.001843 | < 0.07 |
| ART_NNRTI | TAG(42:1)-FA(18:1) | 0.11  | 0.03 | 3.15  | 0.001879 | < 0.07 |
| VAT       | TAG(48:2)-FA(18:2) | 14.38 | 4.57 | 3.15  | 0.001896 | < 0.07 |
| VAT       | TAG(51:1)-FA(17:0) | 14.49 | 4.6  | 3.15  | 0.001913 | < 0.07 |
| VAT       | TAG(48:3)-FA(14:0) | 14.73 | 4.69 | 3.14  | 0.001945 | < 0.07 |
| VAT       | TAG(50:0)-FA(16:0) | 14.3  | 4.55 | 3.14  | 0.001937 | < 0.07 |
| VAT       | TAG(52:2)-FA(16:1) | 14.41 | 4.6  | 3.13  | 0.002008 | < 0.07 |
| VAT       | TAG(51:2)-FA(15:0) | 14.51 | 4.64 | 3.13  | 0.00203  | < 0.07 |
| ART_NNRTI | TAG(44:1)-FA(18:1) | 0.11  | 0.04 | 3.12  | 0.002072 | < 0.07 |

**Supplementary Table S6:** Top 10% nodes in community c1 based on the degree. Thus, the most interconnected nodes in the community. The lipids TAG(52:2)-FA(16:0), TAG(52:2)-FA(18:1) and TAG(54:3)-FA(20:3) are marked in bold, as they were among the key lipids.

| Rank      | Biochemicals              | Degree     |
|-----------|---------------------------|------------|
| 1         | TAG(50:3)-FA(18:2)        | 639        |
| 2         | TAG(51:3)-FA(17:0)        | 637        |
| 3         | DAG(18:0/18:1)            | 636        |
| 4         | TAG(50:3)-FA(16:0)        | 636        |
| 5         | TAG(50:4)-FA(16:0)        | 636        |
| 6         | TAG(53:2)-FA(17:0)        | 635        |
| 7         | TAG(51:3)-FA(16:0)        | 634        |
| 8         | TAG(53:4)-FA(16:0)        | 633        |
| 9         | TAG(52:2)-FA(20:0)        | 632        |
| 10        | TAG(51:3)-FA(16:1)        | 631        |
| 11        | TAG(48:4)-FA(16:1)        | 630        |
| 12        | TAG(50:2)-FA(14:0)        | 630        |
| <b>13</b> | <b>TAG(52:2)-FA(16:0)</b> | <b>630</b> |
| 14        | TAG(52:2)-FA(16:1)        | 630        |
| <b>15</b> | <b>TAG(52:2)-FA(18:1)</b> | <b>630</b> |
| 16        | TAG(50:3)-FA(18:1)        | 629        |
| 17        | TAG(51:4)-FA(16:0)        | 629        |
| 18        | TAG(52:4)-FA(14:0)        | 629        |
| 19        | TAG(53:2)-FA(18:1)        | 629        |
| 20        | TAG(54:5)-FA(22:5)        | 629        |
| 21        | DAG(14:0/18:2)            | 628        |
| 22        | TAG(51:2)-FA(18:1)        | 628        |
| 23        | TAG(52:5)-FA(14:0)        | 628        |
| 24        | TAG(54:4)-FA(20:4)        | 628        |
| 25        | TAG(52:3)-FA(20:2)        | 627        |
| 26        | TAG(50:2)-FA(18:1)        | 627        |
| 27        | TAG(52:4)-FA(20:2)        | 627        |
| 28        | TAG(52:5)-FA(20:3)        | 627        |
| 29        | TAG(50:3)-FA(14:1)        | 626        |
| 30        | TAG(53:5)-FA(20:4)        | 626        |
| 31        | TAG(52:6)-FA(20:4)        | 625        |
| <b>32</b> | <b>TAG(54:3)-FA(20:3)</b> | <b>625</b> |
| 33        | DAG(16:0/20:4)            | 624        |
| 34        | TAG(52:7)-FA(18:1)        | 624        |
